# Supplementary material for: Accelerating Protein Docking in ZDOCK Using an Advanced 3D Convolution Library
Source: PubMed Central journal article supplement (PMC3176283; doi:10.1371/journal.pone.0024657), 2011-09-19
Supplement: pone.0024657.s002.pdf [file pone.0024657.s002.pdf]

**Table S2.** Predictive performance of ZDOCK 3.0, 3.0.1, 3.0.2f and 3.0.2 for the test cases in Benchmark 4.0. Hits2K denotes the number of hits in the top 2000 predictions, Rank is the rank of first hit, and RMSD is the RMSD of first hit.

| Test Case | ZDOCK 3.0 |      |      | ZDOCK 3.0.1 |      |      | ZDOCK 3.0.2f |      |      | ZDOCK 3.0.2 |      |      |
|-----------|-----------|------|------|-------------|------|------|--------------|------|------|-------------|------|------|
|           | Hits 2K   | Rank | RMSD | Hits 2K     | Rank | RMSD | Hits 2K      | Rank | RMSD | Hits 2K     | Rank | RMSD |
| 1AHW      | 7         | 182  | 2.37 | 7           | 177  | 2.37 | 7            | 137  | 2.35 | 3           | 386  | 1.71 |
| 1BVK      | 3         | 1018 | 2.38 | 3           | 1015 | 2.38 | 4            | 386  | 1.95 | 5           | 654  | 2.16 |
| 1DQJ      | 0         | --   | --   | 0           | --   | --   | 1            | 1622 | 1.83 | 2           | 1412 | 2.31 |
| 1E6J      | 16        | 10   | 2.31 | 16          | 9    | 2.31 | 13           | 11   | 2.22 | 13          | 3    | 2.42 |
| 1JPS      | 3         | 307  | 1.90 | 3           | 293  | 1.90 | 6            | 231  | 2.02 | 5           | 531  | 2.35 |
| 1MLC      | 9         | 486  | 1.15 | 9           | 488  | 1.15 | 11           | 312  | 1.78 | 10          | 71   | 1.54 |
| 1VFB      | 4         | 677  | 1.79 | 4           | 669  | 1.79 | 3            | 424  | 1.59 | 4           | 207  | 1.90 |
| 1WEJ      | 13        | 6    | 1.02 | 13          | 6    | 1.02 | 10           | 26   | 1.08 | 12          | 20   | 1.16 |
| 2FD6      | 5         | 25   | 2.09 | 6           | 24   | 2.09 | 7            | 10   | 1.37 | 7           | 39   | 2.13 |
| 2I25      | 18        | 1    | 2.06 | 18          | 1    | 2.06 | 18           | 8    | 2.44 | 18          | 2    | 1.75 |
| 2VIS      | 12        | 30   | 2.32 | 6           | 215  | 1.86 | 10           | 226  | 2.12 | 10          | 757  | 2.05 |
| 1BJ1      | 36        | 1    | 1.95 | 19          | 4    | 1.41 | 38           | 1    | 1.54 | 45          | 1    | 1.19 |
| 1FSK      | 17        | 4    | 0.91 | 17          | 4    | 0.91 | 18           | 2    | 1.99 | 14          | 6    | 2.28 |
| 1I9R      | 0         | --   | --   | 0           | --   | --   | 2            | 18   | 2.40 | 1           | 31   | 2.28 |
| 1IQD      | 13        | 5    | 1.12 | 13          | 5    | 1.12 | 14           | 2    | 2.50 | 11          | 2    | 1.75 |
| 1K4C      | 0         | 2337 | 1.08 | 0           | 2324 | 1.08 | 1            | 1828 | 1.06 | 2           | 926  | 1.26 |
| 1KXQ      | 3         | 35   | 1.30 | 3           | 35   | 1.30 | 3            | 107  | 2.01 | 4           | 6    | 1.16 |
| 1NCA      | 5         | 64   | 0.95 | 5           | 70   | 0.95 | 5            | 47   | 0.83 | 4           | 56   | 1.04 |
| 1NSN      | 0         | --   | --   | 0           | --   | --   | 1            | 652  | 0.91 | 1           | 1816 | 2.50 |
| 1QFW      | 3         | 443  | 1.36 | 4           | 450  | 1.36 | 3            | 596  | 1.42 | 3           | 801  | 1.28 |
| 2QFW      | 9         | 13   | 2.37 | 9           | 13   | 2.37 | 10           | 9    | 1.97 | 10          | 6    | 2.02 |
| 2JEL      | 18        | 9    | 1.53 | 18          | 9    | 1.53 | 23           | 19   | 1.48 | 21          | 13   | 1.53 |
| 1AVX      | 10        | 17   | 2.13 | 10          | 17   | 2.13 | 11           | 21   | 1.99 | 17          | 12   | 2.15 |
| 1AY7      | 3         | 1041 | 2.36 | 3           | 1042 | 2.36 | 5            | 1029 | 1.39 | 4           | 1117 | 2.29 |
| 1BVN      | 9         | 1    | 2.16 | 9           | 1    | 2.16 | 10           | 1    | 1.95 | 8           | 3    | 1.64 |
| 1CGI      | 2         | 261  | 2.47 | 2           | 257  | 2.47 | 2            | 120  | 2.45 | 2           | 11   | 2.43 |
| 1CLV      | 26        | 1    | 1.48 | 25          | 1    | 1.48 | 25           | 1    | 1.39 | 22          | 2    | 1.57 |
| 1D6R      | 0         | --   | --   | 0           | --   | --   | 0            | --   | --   | 0           | --   | --   |
| 1DFJ      | 4         | 1    | 1.93 | 4           | 1    | 1.93 | 5            | 1    | 2.03 | 6           | 1    | 1.90 |
| 1E6E      | 8         | 6    | 1.23 | 8           | 6    | 1.23 | 9            | 16   | 1.22 | 7           | 41   | 2.43 |
| 1EAW      | 8         | 83   | 1.31 | 9           | 83   | 1.31 | 9            | 66   | 1.73 | 7           | 51   | 1.49 |
| 1EWY      | 6         | 56   | 1.58 | 7           | 53   | 1.58 | 8            | 17   | 2.30 | 5           | 138  | 2.08 |
| 1EZU      | 5         | 302  | 2.03 | 3           | 320  | 2.03 | 6            | 335  | 2.48 | 4           | 396  | 1.61 |
| 1F34      | 2         | 68   | 2.37 | 2           | 59   | 2.37 | 1            | 503  | 1.98 | 2           | 312  | 1.78 |
| 1FLE      | 5         | 321  | 2.32 | 5           | 318  | 2.32 | 5            | 472  | 2.32 | 2           | 535  | 1.91 |
| 1GL1      | 6         | 16   | 1.44 | 6           | 16   | 1.44 | 6            | 84   | 1.57 | 3           | 54   | 1.46 |
| 1GXD      | 1         | 490  | 2.44 | 1           | 491  | 2.44 | 0            | --   | --   | 0           | --   | --   |
| 1HIA      | 0         | --   | --   | 0           | --   | --   | 0            | --   | --   | 0           | --   | --   |
| 1JTG      | 13        | 1    | 1.51 | 13          | 1    | 1.51 | 14           | 1    | 1.51 | 11          | 1    | 1.33 |
| 1MAH      | 14        | 1    | 1.01 | 14          | 1    | 1.01 | 14           | 1    | 1.24 | 15          | 1    | 1.02 |
| 1N8O      | 12        | 1    | 1.29 | 11          | 1    | 1.29 | 13           | 2    | 1.32 | 11          | 13   | 1.27 |
| 1OC0      | 0         | --   | --   | 0           | --   | --   | 0            | --   | --   | 1           | 190  | 2.21 |
| 1OPH      | 0         | --   | --   | 0           | --   | --   | 0            | --   | --   | 1           | 1358 | 2.41 |
| 1OYV      | 8         | 1    | 2.17 | 8           | 1    | 2.17 | 9            | 1    | 1.43 | 5           | 8    | 1.68 |
| BOYV      | 0         | --   | --   | 0           | --   | --   | 0            | --   | --   | 0           | --   | --   |
| 1PPE      | 36        | 1    | 1.20 | 36          | 1    | 1.20 | 42           | 1    | 1.00 | 45          | 1    | 1.49 |
| 1R0R      | 8         | 66   | 0.97 | 8           | 65   | 0.97 | 9            | 98   | 1.05 | 8           | 173  | 2.48 |
| 1TMQ      | 11        | 15   | 1.74 | 11          | 15   | 1.74 | 11           | 13   | 2.15 | 9           | 9    | 1.90 |
| 1UDI      | 4         | 39   | 1.78 | 4           | 36   | 1.78 | 5            | 37   | 1.91 | 4           | 61   | 1.46 |
| 1YVB      | 20        | 4    | 1.99 | 19          | 4    | 1.99 | 18           | 2    | 2.08 | 20          | 1    | 1.74 |
| 2ABZ      | 3         | 86   | 2.15 | 3           | 84   | 2.15 | 1            | 280  | 2.11 | 1           | 421  | 2.20 |
| 2B42      | 6         | 3    | 1.63 | 6           | 3    | 1.63 | 6            | 2    | 1.55 | 7           | 4    | 2.17 |
| 2J0T      | 0         | --   | --   | 0           | --   | --   | 0            | --   | --   | 0           | 2895 | 2.49 |
| 2MTA      | 9         | 76   | 2.22 | 9           | 75   | 2.22 | 11           | 43   | 2.26 | 9           | 17   | 2.48 |
| 2O8V      | 2         | 412  | 2.48 | 2           | 414  | 2.48 | 1            | 1771 | 2.33 | 0           | --   | --   |
| 2OUL      | 13        | 1    | 1.32 | 13          | 1    | 1.32 | 16           | 1    | 1.17 | 15          | 1    | 1.51 |
| 2PCC      | 1         | 451  | 1.76 | 1           | 442  | 1.76 | 0            | --   | --   | 0           | --   | --   |
| 2SIC      | 13        | 3    | 0.75 | 13          | 3    | 0.75 | 14           | 1    | 1.28 | 18          | 2    | 1.34 |
| 2SNI      | 3         | 858  | 2.00 | 3           | 867  | 2.00 | 3            | 825  | 1.33 | 7           | 48   | 1.91 |
| 2UUY      | 8         | 312  | 2.29 | 8           | 311  | 2.29 | 10           | 492  | 1.84 | 11          | 374  | 1.83 |

|      |    |      |      |    |      |      |    |      |      |    |      |      |
|------|----|------|------|----|------|------|----|------|------|----|------|------|
| 3SGQ | 5  | 294  | 1.94 | 5  | 296  | 1.94 | 3  | 321  | 2.23 | 5  | 292  | 1.18 |
| 7CEI | 21 | 1    | 2.31 | 22 | 1    | 2.31 | 20 | 1    | 2.46 | 22 | 1    | 1.79 |
| 1A2K | 0  | 2507 | 1.96 | 0  | 2545 | 1.96 | 0  | --   | --   | 1  | 1015 | 2.46 |
| 1AK4 | 0  | --   | --   | 0  | --   | --   | 0  | 2286 | 2.12 | 0  | 3298 | 2.46 |
| 1AKJ | 3  | 145  | 1.86 | 2  | 282  | 1.89 | 3  | 156  | 1.91 | 1  | 1268 | 1.99 |
| 1AZS | 26 | 3    | 1.32 | 15 | 4    | 2.09 | 27 | 3    | 1.42 | 20 | 4    | 1.61 |
| 1B6C | 3  | 60   | 2.13 | 3  | 59   | 2.13 | 2  | 14   | 2.30 | 3  | 3    | 2.30 |
| 1BUH | 9  | 9    | 2.37 | 9  | 8    | 2.37 | 7  | 100  | 1.84 | 7  | 5    | 2.08 |
| 1E96 | 1  | 588  | 2.13 | 1  | 557  | 2.13 | 1  | 267  | 2.09 | 1  | 1205 | 2.39 |
| 1EFN | 0  | 2950 | 2.41 | 0  | 2945 | 2.41 | 0  | 2915 | 1.96 | 1  | 1701 | 2.42 |
| 1F51 | 8  | 1    | 1.84 | 0  | 2075 | 1.52 | 7  | 65   | 1.87 | 9  | 1    | 1.95 |
| 1FC2 | 0  | --   | --   | 0  | --   | --   | 0  | --   | --   | 0  | --   | --   |
| 1FCC | 0  | --   | --   | 0  | --   | --   | 0  | --   | --   | 0  | 3518 | 2.50 |
| 1FFW | 0  | 2502 | 2.15 | 0  | 2542 | 2.15 | 0  | --   | --   | 0  | --   | --   |
| 1FQJ | 0  | --   | --   | 0  | --   | --   | 0  | --   | --   | 0  | --   | --   |
| 1GCQ | 1  | 1169 | 1.05 | 1  | 1148 | 1.05 | 2  | 773  | 1.00 | 0  | 3197 | 2.45 |
| 1GHQ | 0  | --   | --   | 0  | --   | --   | 0  | --   | --   | 0  | --   | --   |
| 1GLA | 0  | --   | --   | 0  | --   | --   | 0  | 2021 | 2.36 | 4  | 698  | 2.33 |
| 1GPW | 2  | 537  | 2.44 | 2  | 526  | 2.44 | 2  | 360  | 2.45 | 3  | 48   | 1.41 |
| 1H9D | 4  | 163  | 1.94 | 4  | 157  | 1.94 | 3  | 303  | 2.14 | 2  | 252  | 2.49 |
| 1HCF | 3  | 501  | 1.82 | 3  | 494  | 1.82 | 6  | 146  | 1.87 | 5  | 10   | 2.42 |
| 1HE1 | 1  | 440  | 1.86 | 1  | 429  | 1.86 | 1  | 478  | 1.93 | 2  | 20   | 2.30 |
| 1I4D | 4  | 693  | 1.88 | 1  | 694  | 1.88 | 3  | 452  | 2.44 | 4  | 88   | 1.96 |
| 1J2J | 3  | 141  | 1.90 | 3  | 142  | 1.90 | 6  | 50   | 2.49 | 2  | 42   | 2.18 |
| 1JWH | 8  | 1    | 2.19 | 4  | 1    | 2.19 | 10 | 1    | 2.32 | 11 | 13   | 2.43 |
| 1K74 | 5  | 1    | 2.43 | 5  | 1    | 2.43 | 4  | 1    | 1.98 | 5  | 17   | 2.30 |
| 1KAC | 2  | 624  | 2.46 | 2  | 619  | 2.46 | 1  | 1130 | 1.50 | 3  | 753  | 1.97 |
| 1KLU | 1  | 1876 | 1.08 | 1  | 1917 | 1.08 | 0  | 3080 | 1.11 | 1  | 1795 | 1.41 |
| 1KTZ | 0  | 2668 | 0.64 | 0  | 2691 | 0.64 | 0  | 2925 | 2.02 | 2  | 1310 | 1.09 |
| 1KXP | 4  | 1    | 2.28 | 4  | 1    | 2.28 | 4  | 1    | 2.15 | 3  | 1    | 2.33 |
| 1ML0 | 8  | 13   | 1.65 | 6  | 13   | 1.65 | 9  | 10   | 2.06 | 13 | 1    | 1.85 |
| 1OFU | 9  | 188  | 2.44 | 9  | 190  | 2.44 | 5  | 76   | 2.37 | 12 | 86   | 1.89 |
| 1PVH | 6  | 1025 | 2.34 | 6  | 1023 | 2.34 | 2  | 1123 | 2.37 | 4  | 934  | 1.44 |
| 1QA9 | 0  | --   | --   | 0  | --   | --   | 0  | --   | --   | 0  | --   | --   |
| 1RLB | 27 | 1    | 2.38 | 7  | 6    | 1.90 | 33 | 1    | 2.27 | 36 | 5    | 2.15 |
| 1RV6 | 15 | 3    | 1.53 | 9  | 3    | 1.53 | 16 | 1    | 1.68 | 11 | 3    | 2.16 |
| 1S1Q | 2  | 1084 | 2.39 | 2  | 1075 | 2.39 | 2  | 968  | 1.86 | 3  | 936  | 1.57 |
| 1SBB | 1  | 1542 | 1.94 | 1  | 1572 | 1.94 | 1  | 1762 | 1.94 | 1  | 1560 | 1.57 |
| 1T6B | 2  | 309  | 1.91 | 2  | 333  | 1.91 | 4  | 42   | 1.68 | 3  | 166  | 2.45 |
| 1US7 | 2  | 255  | 2.38 | 2  | 251  | 2.38 | 1  | 344  | 1.46 | 2  | 181  | 1.25 |
| 1WDW | 9  | 2    | 2.46 | 5  | 8    | 2.35 | 9  | 2    | 1.55 | 7  | 1    | 1.54 |
| 1XD3 | 12 | 15   | 2.42 | 12 | 15   | 2.42 | 11 | 24   | 2.44 | 10 | 7    | 2.32 |
| 1XU1 | 15 | 100  | 2.30 | 0  | 2260 | 2.32 | 12 | 123  | 2.36 | 12 | 104  | 2.44 |
| 1ZOK | 4  | 20   | 1.63 | 4  | 20   | 1.63 | 5  | 1    | 1.75 | 4  | 2    | 1.94 |
| 1Z5Y | 7  | 86   | 1.98 | 7  | 86   | 1.98 | 7  | 13   | 2.32 | 5  | 8    | 1.78 |
| 1ZHH | 0  | --   | --   | 0  | --   | --   | 0  | --   | --   | 0  | --   | --   |
| 1ZHI | 10 | 67   | 1.90 | 10 | 66   | 1.90 | 9  | 41   | 1.69 | 14 | 86   | 2.01 |
| 2A5T | 0  | --   | --   | 0  | --   | --   | 0  | --   | --   | 0  | --   | --   |
| 2A9K | 0  | --   | --   | 0  | --   | --   | 1  | 834  | 2.37 | 1  | 1602 | 1.91 |
| 2AJF | 0  | --   | --   | 0  | --   | --   | 0  | --   | --   | 2  | 1015 | 2.34 |
| 2B4J | 0  | --   | --   | 0  | --   | --   | 0  | --   | --   | 0  | --   | --   |
| 2BTF | 6  | 65   | 1.06 | 6  | 67   | 1.06 | 6  | 241  | 2.09 | 5  | 459  | 2.21 |
| 2FJU | 3  | 77   | 1.46 | 3  | 77   | 1.46 | 4  | 197  | 1.26 | 2  | 455  | 1.33 |
| 2G77 | 4  | 30   | 2.39 | 4  | 29   | 2.39 | 2  | 37   | 2.37 | 1  | 36   | 2.44 |
| 2HLE | 3  | 91   | 2.32 | 3  | 84   | 2.32 | 4  | 12   | 2.26 | 3  | 281  | 2.47 |
| 2HQS | 1  | 1701 | 2.19 | 1  | 1675 | 2.19 | 0  | 3244 | 2.37 | 0  | --   | --   |
| 2O0B | 0  | --   | --   | 0  | --   | --   | 1  | 934  | 2.35 | 0  | --   | --   |
| 2O0R | 0  | --   | --   | 0  | --   | --   | 1  | 161  | 2.45 | 0  | --   | --   |
| 2VDB | 5  | 23   | 1.32 | 5  | 23   | 1.32 | 7  | 23   | 1.35 | 6  | 182  | 0.95 |
| 3BP8 | 3  | 276  | 1.51 | 1  | 1512 | 2.37 | 4  | 570  | 1.60 | 3  | 609  | 2.38 |
| 3D5S | 7  | 56   | 1.95 | 7  | 58   | 1.95 | 5  | 85   | 1.66 | 6  | 73   | 1.73 |
| 1BGX | 0  | --   | --   | 0  | --   | --   | 0  | --   | --   | 0  | --   | --   |
| 1ACB | 0  | --   | --   | 0  | --   | --   | 0  | --   | --   | 0  | --   | --   |
| 1IJK | 3  | 458  | 1.77 | 3  | 467  | 1.77 | 4  | 105  | 1.55 | 4  | 62   | 1.22 |

|      |   |      |      |   |      |      |   |      |      |   |      |      |
|------|---|------|------|---|------|------|---|------|------|---|------|------|
| 1JIW | 0 | --   | --   | 0 | --   | --   | 0 | --   | --   | 0 | --   | --   |
| 1KKL | 0 | --   | --   | 0 | --   | --   | 0 | --   | --   | 0 | --   | --   |
| 1M10 | 0 | --   | --   | 0 | --   | --   | 0 | --   | --   | 0 | --   | --   |
| 1NW9 | 0 | --   | --   | 0 | --   | --   | 0 | --   | --   | 0 | --   | --   |
| 4CPA | 7 | 1    | 2.39 | 7 | 1    | 2.39 | 8 | 3    | 2.50 | 6 | 1    | 2.39 |
| 1GP2 | 0 | --   | --   | 0 | --   | --   | 0 | --   | --   | 0 | --   | --   |
| 1GRN | 3 | 715  | 1.95 | 3 | 629  | 1.95 | 1 | 1462 | 2.37 | 3 | 841  | 1.94 |
| 1HE8 | 0 | --   | --   | 0 | --   | --   | 0 | --   | --   | 0 | --   | --   |
| 1I2M | 1 | 219  | 2.39 | 1 | 210  | 2.39 | 1 | 184  | 2.43 | 1 | 128  | 2.49 |
| 1IB1 | 0 | --   | --   | 0 | --   | --   | 0 | --   | --   | 0 | --   | --   |
| 1K5D | 1 | 1287 | 2.13 | 1 | 1483 | 2.13 | 0 | --   | --   | 2 | 180  | 2.36 |
| 1LFD | 4 | 376  | 2.30 | 4 | 441  | 2.30 | 2 | 329  | 2.35 | 3 | 489  | 2.13 |
| 1MQ8 | 0 | --   | --   | 0 | --   | --   | 0 | --   | --   | 0 | 2061 | 2.37 |
| 1N2C | 0 | --   | --   | 0 | --   | --   | 0 | --   | --   | 0 | --   | --   |
| 1R6Q | 1 | 989  | 2.45 | 1 | 911  | 2.45 | 0 | --   | --   | 0 | --   | --   |
| 1SYX | 0 | --   | --   | 0 | --   | --   | 1 | 1588 | 2.38 | 0 | --   | --   |
| 1WQ1 | 1 | 2    | 2.30 | 1 | 2    | 2.30 | 1 | 20   | 2.37 | 2 | 108  | 1.95 |
| 1XQS | 3 | 44   | 2.09 | 3 | 39   | 2.09 | 2 | 18   | 2.07 | 2 | 34   | 2.25 |
| 2AYO | 4 | 22   | 2.23 | 4 | 22   | 2.23 | 6 | 7    | 2.32 | 3 | 82   | 1.89 |
| 2CFH | 7 | 2    | 2.21 | 7 | 2    | 2.21 | 7 | 1    | 2.23 | 6 | 1    | 1.82 |
| 2H7V | 4 | 80   | 2.38 | 4 | 79   | 2.38 | 3 | 21   | 2.35 | 5 | 4    | 2.36 |
| 2HRK | 1 | 232  | 2.49 | 1 | 231  | 2.49 | 3 | 61   | 2.45 | 0 | --   | --   |
| 2J7P | 0 | --   | --   | 0 | --   | --   | 0 | --   | --   | 0 | --   | --   |
| 2NZ8 | 1 | 601  | 2.31 | 1 | 671  | 2.31 | 0 | --   | --   | 1 | 76   | 2.45 |
| 2OZA | 0 | --   | --   | 0 | --   | --   | 0 | --   | --   | 0 | --   | --   |
| 2Z0E | 0 | --   | --   | 0 | --   | --   | 0 | --   | --   | 0 | --   | --   |
| 3CPH | 0 | --   | --   | 0 | --   | --   | 0 | --   | --   | 0 | --   | --   |
| 1E4K | 0 | --   | --   | 0 | --   | --   | 0 | --   | --   | 0 | --   | --   |
| 2HMI | 0 | --   | --   | 0 | --   | --   | 0 | --   | --   | 0 | --   | --   |
| 1F6M | 0 | --   | --   | 0 | --   | --   | 0 | --   | --   | 0 | --   | --   |
| 1FQ1 | 0 | --   | --   | 0 | --   | --   | 0 | --   | --   | 0 | --   | --   |
| 1PXV | 0 | --   | --   | 0 | --   | --   | 0 | --   | --   | 0 | --   | --   |
| 1ZLI | 0 | --   | --   | 0 | --   | --   | 0 | --   | --   | 0 | --   | --   |
| 2O3B | 0 | --   | --   | 0 | --   | --   | 0 | --   | --   | 0 | --   | --   |
| 1ATN | 0 | --   | --   | 0 | --   | --   | 0 | --   | --   | 0 | --   | --   |
| 1BKD | 0 | --   | --   | 0 | --   | --   | 0 | --   | --   | 0 | --   | --   |
| 1DE4 | 0 | --   | --   | 0 | --   | --   | 0 | --   | --   | 0 | --   | --   |
| 1EER | 0 | --   | --   | 0 | --   | --   | 0 | --   | --   | 0 | --   | --   |
| 1FAK | 0 | --   | --   | 0 | --   | --   | 0 | --   | --   | 0 | --   | --   |
| 1H1V | 0 | --   | --   | 0 | --   | --   | 0 | --   | --   | 0 | --   | --   |
| 1IBR | 0 | --   | --   | 0 | --   | --   | 0 | --   | --   | 0 | --   | --   |
| 1IRA | 0 | --   | --   | 0 | --   | --   | 0 | --   | --   | 0 | --   | --   |
| 1JK9 | 0 | --   | --   | 0 | --   | --   | 0 | --   | --   | 0 | --   | --   |
| 1JMO | 0 | --   | --   | 0 | --   | --   | 0 | --   | --   | 0 | --   | --   |
| 1JZD | 0 | --   | --   | 0 | --   | --   | 0 | --   | --   | 0 | --   | --   |
| 1R8S | 0 | --   | --   | 0 | --   | --   | 0 | --   | --   | 0 | --   | --   |
| 1Y64 | 0 | --   | --   | 0 | --   | --   | 0 | --   | --   | 0 | --   | --   |
| 1ZM4 | 0 | --   | --   | 0 | --   | --   | 0 | --   | --   | 0 | --   | --   |
| 2COL | 0 | --   | --   | 0 | --   | --   | 0 | --   | --   | 0 | --   | --   |
| 2I9B | 0 | --   | --   | 0 | --   | --   | 0 | --   | --   | 0 | --   | --   |
| 2IDO | 0 | --   | --   | 0 | --   | --   | 0 | --   | --   | 0 | --   | --   |
| 2OT3 | 0 | --   | --   | 0 | --   | --   | 0 | --   | --   | 0 | --   | --   |
